# Supplementary material
Source: publisher figshare collection journal article supplement (https://acs.figshare.com/ndownloader/files/23728140)
Supplement: Supplementary file 1 [file 23728140]

## Supporting Information

### Growth of Carbon Dot-Decorated ZnO Nanorod on a Graphite-Coated Paper Substrate to Fabricate a Flexible and Self-Powered Schottky Diode for UV Detection

Rupam Sinha<sup>1</sup>, Nirmal Roy<sup>2</sup> and Tapas K. Mandal<sup>1,2\*</sup>

<sup>1</sup>*Department of Chemical Engineering, Indian Institute of Technology Guwahati, Assam, 781039, India*

<sup>2</sup>*Centre for Nanotechnology, Indian Institute of Technology Guwahati, Assam, 781039, India*

*\*Email corresponding author: [tapasche@iitg.ac.in](mailto:tapasche@iitg.ac.in)*

**Table S1.** Lattice constants for different crystalline planes.

| Crystalline plane | 2 $\theta$ | c(nm)    | a(nm)    |
|-------------------|------------|----------|----------|
| 100               | 31.86°     | 5.06174  | 3.239362 |
| 002               | 34.54°     | 5.187166 | 2.994812 |
| 101               | 36.36°     | 4.935652 | 2.8496   |

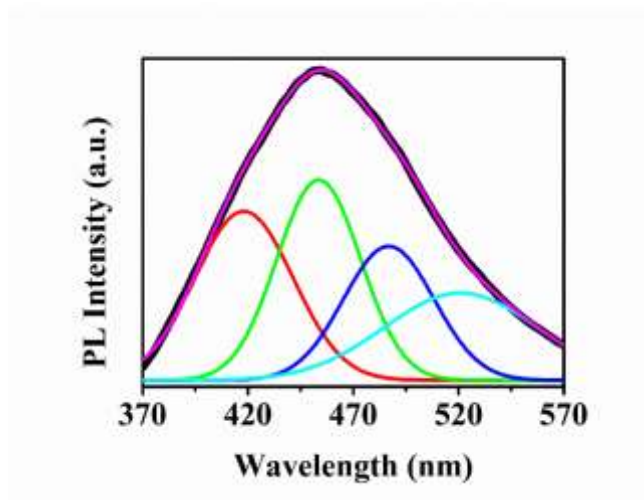

Figure S1. Deconvoluted PL peak of CD enhanced ZnO nanorods at an excitation wavelength of 340 nm.

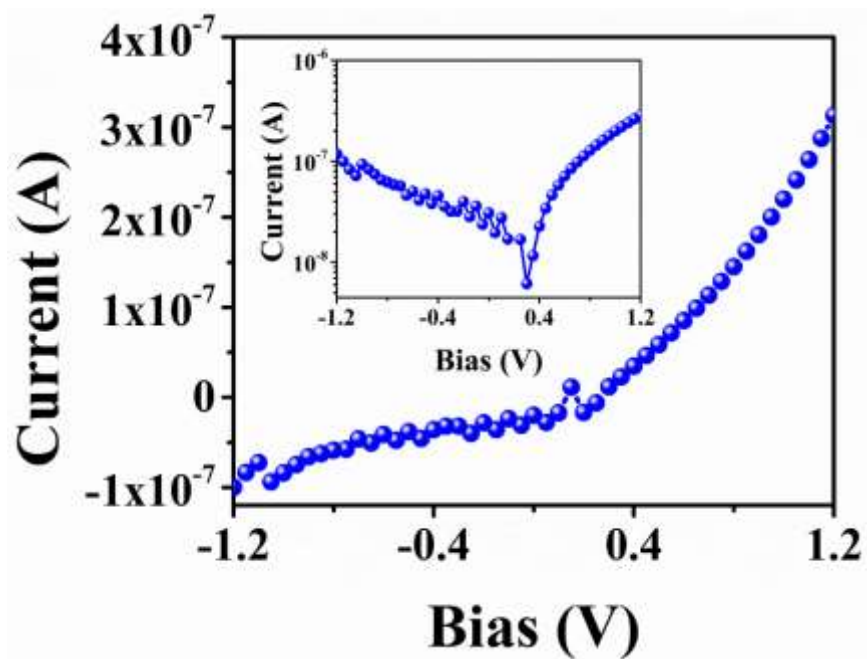

Figure S2.  $I$ – $V$  plot of the ZnO/graphite Schottky diode in linear and semilogarithmic scale (inset) in dark.

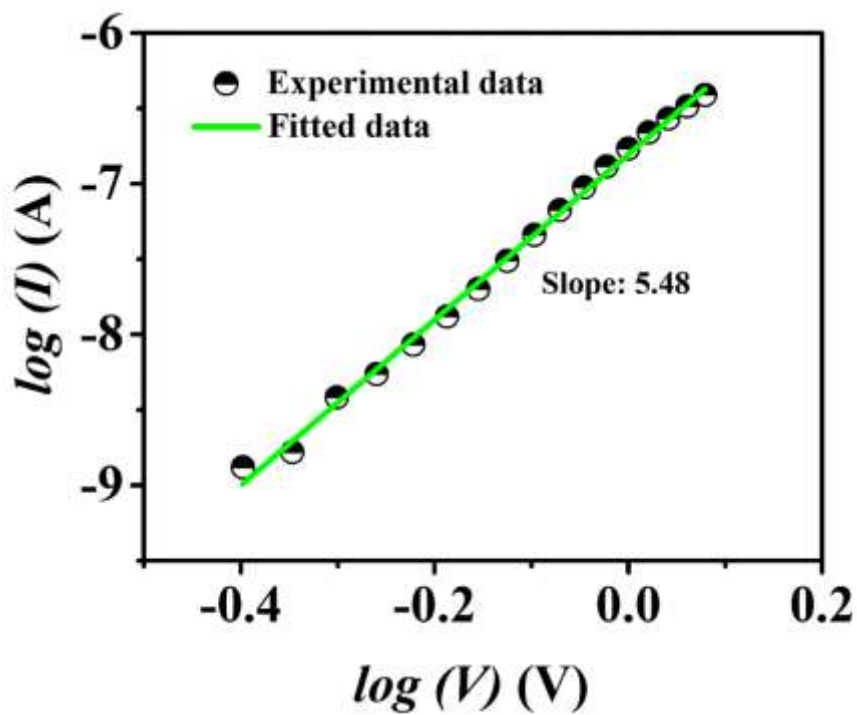

Figure S3.  $\log(I)$  vs.  $\log(V)$  plot of the CD enhanced ZnO/graphite Schottky diode (in the forward bias condition).

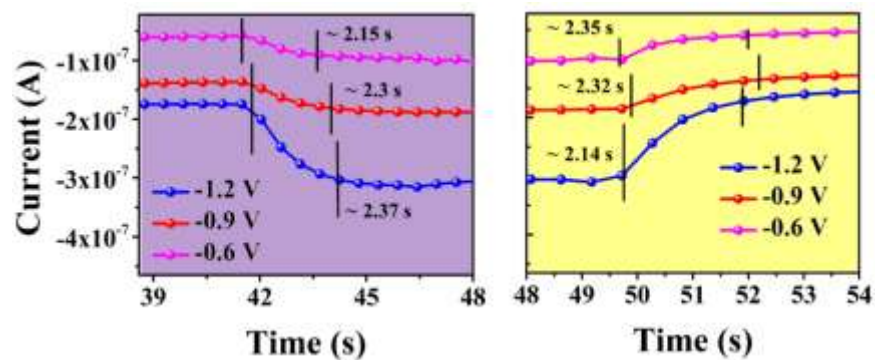

Figure S4. The response time and the recovery time of the CD enhanced ZnO/graphite Schottky diode at different reverse bias voltages.

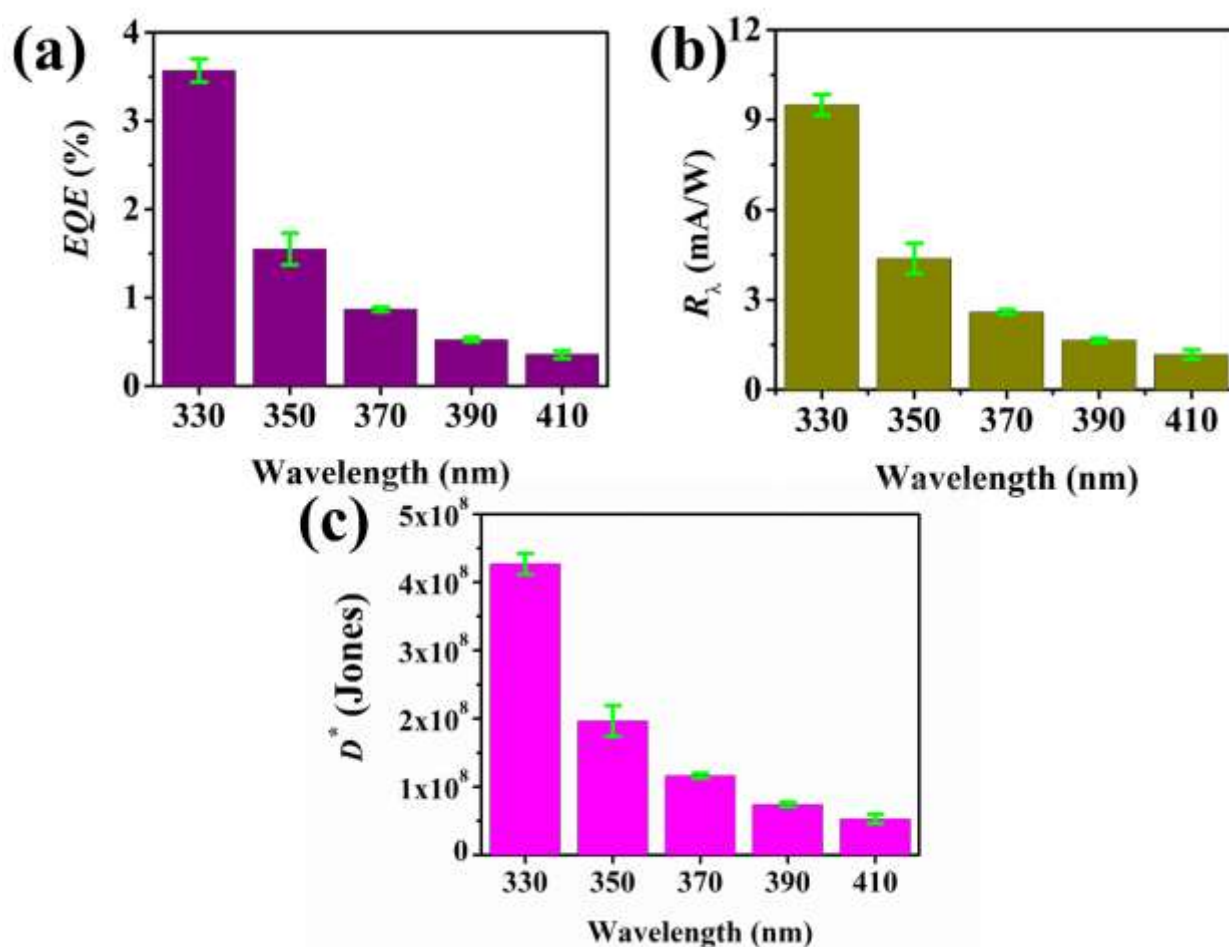

Figure S5. (a) External quantum efficiency (EQE) vs. wavelength plot, (b) Responsivity vs. wavelength plot, and (c) Specific detectivity vs. wavelength.
